# Supplementary material
Source: PubMed Central journal article supplement (PMC8441807)
Supplement: ACEM-28-761-s001.pdf [file ACEM-28-761-s001.pdf]

Data Supplement S1. Individual diagnostic performance of the 11 components of the CORC rule

|             | Black race | White race | Hispanic or Latino ethnicity | Age > 50 | Loss of taste or smell | Non-productive cough | Symptom: Fever | Symptom: Muscle aches | No exposure to COVID | Household contact | SpO2 at triage < 95% | T in Celsius > 37.5 | Current smoker |
|-------------|------------|------------|------------------------------|----------|------------------------|----------------------|----------------|-----------------------|----------------------|-------------------|----------------------|---------------------|----------------|
| Sensitivity | 61%        | 68%        | 12%                          | 54%      | 17%                    | 49%                  | 41%            | 51%                   | 41%                  | 27%               | 27%                  | 10%                 | 78%            |
| Specificity | 57%        | 53%        | 96%                          | 47%      | 95%                    | 71%                  | 84%            | 79%                   | 91%                  | 97%               | 81%                  | 93%                 | 24%            |
| LR(-)       | 0.69       | 0.60       | 0.91                         | 0.99     | 0.87                   | 0.72                 | 0.70           | 0.62                  | 0.64                 | 0.75              | 0.90                 | 0.97                | 0.90           |
| LR(+)       | 1.4        | 1.4        | 3.3                          | 1.0      | 3.3                    | 1.7                  | 2.6            | 2.5                   | 4.8                  | 10.3              | 1.4                  | 1.4                 | 1.0            |
